# Supplementary material for: Integrated CRISPR-Cas9 System-Mediated Knockout of IFN-γ and IFN-γ Receptor 1 in the Vero Cell Line Promotes Viral Susceptibility
Source: MDPI journal article supplement (doi:10.3390/ijms23158217), 2022-07-26
Supplement: s1 [file s1]

**a**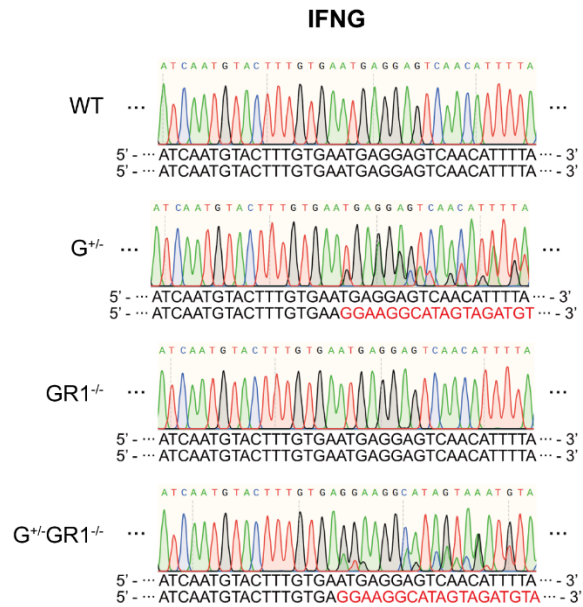**b**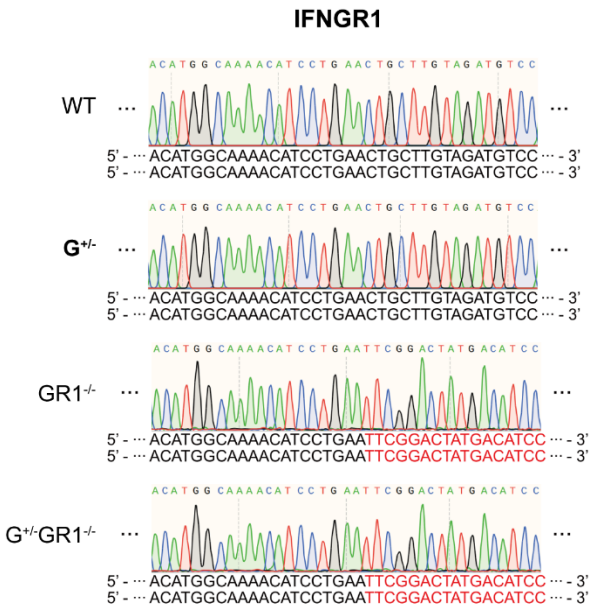

**Supplementary Figure S1. Sanger sequencing analysis of *IFNG*- and *IFNGR1*-knockout Vero cell lines.** (a) Sequencing results of the *IFNG* locus. WT, wild-type Vero cell line;  $G^{+/-}$ , heterozygous deletion of *IFNG* in the Vero cell line;  $GR1^{-/-}$ , homozygous deletion of *IFNGR1* in the Vero cell line;  $G^{+/-}GR1^{-/-}$ , combined deletion of *IFNG* and *IFNGR1* in the Vero cell line. (b) Sequencing results of the *IFNGR1* locus in WT,  $G^{+/-}$ ,  $GR1^{-/-}$ , and  $G^{+/-}GR1^{-/-}$  cell lines.

**a**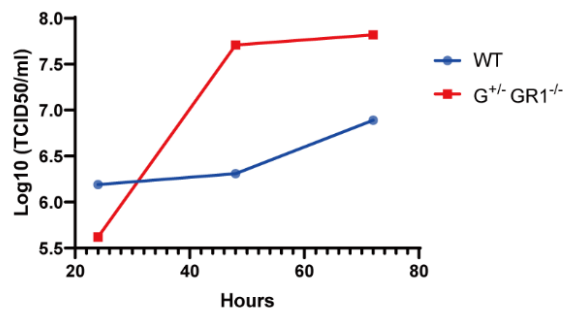**b**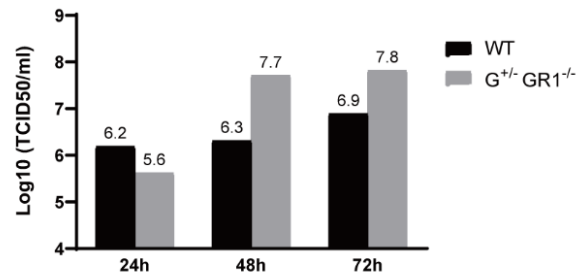

**Supplementary Figure S2. Comparison of HSV-1 virus growth in the wild-type Vero cell line and *IFNG/IFNGR1*-knockout Vero cell line.** (a) HSV-1 growth curves in the wild-type Vero cell line (WT) and *IFNG/IFNGR1*-double-knockout cell line (G<sup>+/-</sup>GR1<sup>-/-</sup>). Infectious titer was measured at the indicated time points in each cell line by endpoint dilution assay. (b) Bar graph showing TCID<sub>50</sub> values for HSV-1 measured at 24-hour intervals.

**a**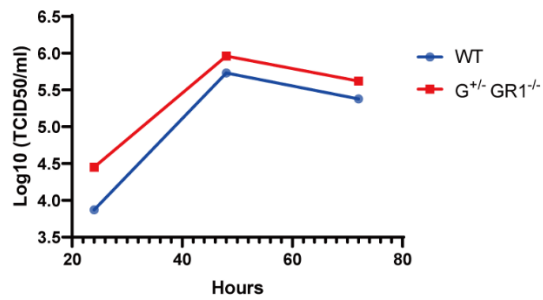**b**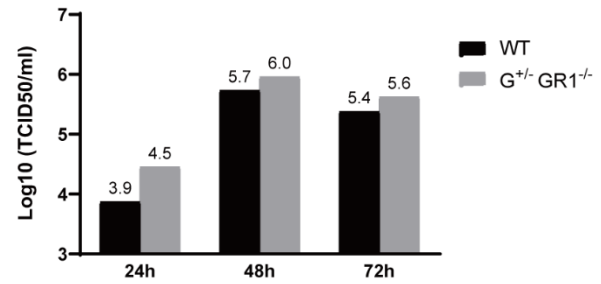

**Supplementary Figure S3. Comparison of HCoV-OC43 virus growth in the wild-type Vero cell line and *IFNG/IFNGR1*-knockout Vero cell line.** (a) HSV-1 growth curves in the wild-type Vero cell line (WT) and *IFNG/IFNGR1*-double-knockout cell line (G<sup>+/-</sup>GR1<sup>-/-</sup>). Infectious titer was measured at the indicated time points in each cell line by endpoint dilution assay. (b) Bar graph showing TCID<sub>50</sub> values for HCoV-OC43 measured at 24-hour intervals.

**a**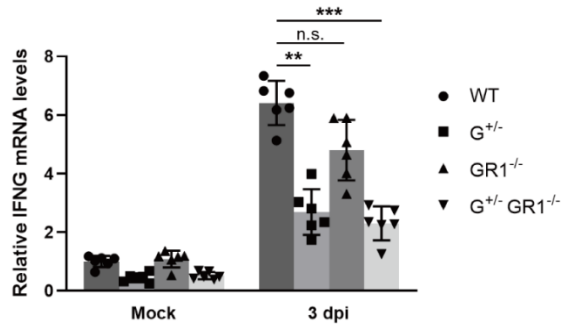**b**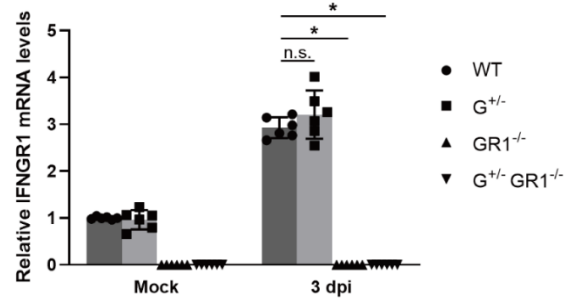

**Supplementary Figure S4. Relative expression levels of *IFNG* and *IFNGR1* after HCoV-OC43 infection in *IFNG*- and *IFNGR1*-knockout cell lines.** (a) Relative expression levels of *IFNG* in G<sup>+/-</sup>, GR1<sup>-/-</sup>, G<sup>+/-</sup>GR1<sup>-/-</sup> cell lines. *IFNG* mRNA levels were normalized to those of wild-type cells. Results are shown as means ± SD of six independent replicates (\* $p < 0.05$ , \*\* $p < 0.01$ , \*\*\* $p < 0.001$ , n.s., not significant). (b) Relative expression levels of *IFNGR1* in G<sup>+/-</sup>, GR1<sup>-/-</sup>, and G<sup>+/-</sup>GR1<sup>-/-</sup> cell lines. *IFNGR1* mRNA levels were normalized to those of wild-type cells.

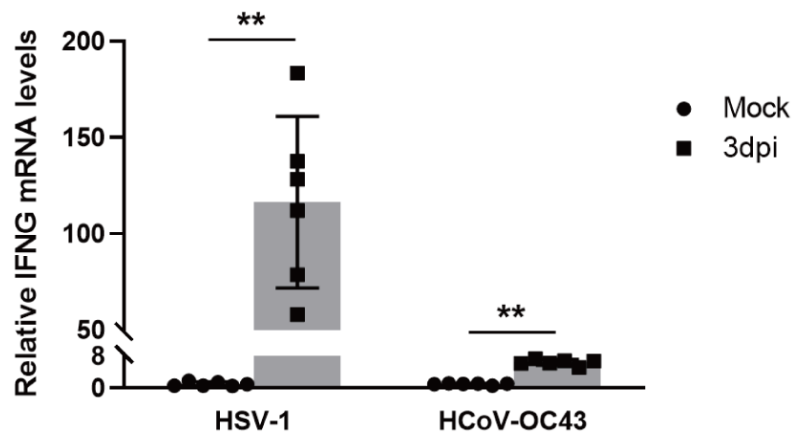

**Supplementary Figure S5. Relative expression levels of *IFNG* after viral infection.** *IFNG* mRNA levels of infected Vero cells were normalized to those of uninfected cells. *IFNG* mRNA levels were measured by RT-qPCR after 48 hours of HSV-1 infection, and 72 hours of HCoV-OC43, respectively. Results are shown as means  $\pm$  SD of six independent replicates (\*\* $p < 0.01$ ).

**Supplementary Table S1. Deleted sequences in *IFNG*- and *IFNGR1*-knockout cell lines**

| Genotype                            | <i>IFNG</i> Sequences                                    | Mutations                                    |
|-------------------------------------|----------------------------------------------------------|----------------------------------------------|
| Wild-type                           | 5' - ...CTTTGTGAATGAGGAGTC...TACACTACAGGAAGGCAT... - 3'  |                                              |
| G <sup>+/-</sup>                    | 5' - ...CTTTGTGAA-----GGAAGGCAT... - 3'                  | 1,405 bp deletion<br>( <i>IFNG</i> Δexon1)   |
| GR1 <sup>-/-</sup>                  | 5' - ...CTTTGTGAATGAGGAGTC...TACACTACAGGAAGGCAT... - 3'  |                                              |
| G <sup>+/-</sup> GR1 <sup>-/-</sup> | 5' - ...CTTTGTGA-----GGAAGGCAT... - 3'                   | 1,406 bp deletion<br>( <i>IFNG</i> Δexon1)   |
| Genotype                            | <i>IFNGR1</i> Sequences                                  | Mutations                                    |
| Wild-type                           | 5' - ...CATCCTGAACTGCTTGTA...GATCCTGTTTTCGGACTAT... - 3' |                                              |
| G <sup>+/-</sup>                    | 5' - ...CATCCTGAACTGCTTGTA...GATCCTGTTTTCGGACTAT... - 3' |                                              |
| GR1 <sup>-/-</sup>                  | 5' - ...CATCCTGAA-----TTCGGACTAT... - 3'                 | 1,651 bp deletion<br>( <i>IFNGR1</i> Δexon3) |
| G <sup>+/-</sup> GR1 <sup>-/-</sup> | 5' - ...CATCCTGAA-----TTCGGACTAT... - 3'                 | 1,651 bp deletion<br>( <i>IFNGR1</i> Δexon3) |

**Supplementary Table S2. gRNA sequences for targeting *IFNG* and *IFNGR1***

| Target gene   | gRNA sequences with PAM         | Target region   |
|---------------|---------------------------------|-----------------|
| <i>IFNG</i>   | 5'-GATCAATGTACTTTGTGAATG AGG-3' | Exon 1          |
|               | 5'-GTGACGTAATACACTACAGGA AGG-3' | Exon 1 ~ Exon 2 |
| <i>IFNGR1</i> | 5'-GTGGACATCTACAAGCAGTTC AGG-3' | Exon 2 ~ Exon 3 |
|               | 5'-GGATGTCATAGTCCGAAAAC AGG-3'  | Exon 3 ~ Exon 4 |

**Supplementary Table S3. Target-specific primers for PCR-based genotyping**

| Target gene   | Primer sequences |                                | PCR product size |
|---------------|------------------|--------------------------------|------------------|
| <i>IFNG</i>   | Forward          | 5'-CCTGTGTGGCTTGTATTATATTTC-3' | 1,831 bp         |
|               | Reverse          | 5'-GTTCAACAAAGCTGATGATACTCC-3' |                  |
| <i>IFNGR1</i> | Forward          | 5'-GTACCAGATCATGCCACAGG-3'     | 2,061 bp         |
|               | Reverse          | 5'-ATGCAGACGGTGTGGTAATC-3'     |                  |



**Supplementary Table S4. Target-specific primers for Sanger sequencing**

| Target gene   | Primer sequences |                                |
|---------------|------------------|--------------------------------|
| <i>IFNG</i>   | Forward-1        | 5'-CCTGTGTGGCTTGTATTATATTTC-3' |
|               | Forward-2        | 5'-CAAATGCCACAAAACCTTAG-3'     |
|               | Forward-3        | 5'-GGTGAGAACTCATTGAGATG-3'     |
|               | Reverse 1        | 5'-GTTCAACAAAGCTGATGATACTCC-3' |
| <i>IFNGR1</i> | Forward-1        | 5'-GTACCAGATCATGCCACAGG-3'     |
|               | Forward-2        | 5'-AGGCTGAGGCAGGAGAATGG-3'     |
|               | Forward-3        | 5'-TCTGATCACGTTGGTGATCC-3'     |
|               | Reverse-1        | 5'-ATGCAGACGGTGTGGTAATC-3'     |

**Supplementary Table S5. Gene-specific primers for RT-qPCR analyses**

| Target gene                    | Primer sequences |                             |
|--------------------------------|------------------|-----------------------------|
| <i>IFNG</i>                    | Forward          | 5'-TGGAAAGAGGAGAGTGACAG-3'  |
|                                | Reverse          | 5'-TCAGCTTTTTCGAAGTCATCC-3' |
| <i>IFNGR1</i>                  | Forward          | 5'-AACTATGGTGTTAAGAATGC-3'  |
|                                | Reverse          | 5'-GGTCCAATTTTTCCATCTCG-3'  |
| <i>TNF-<math>\alpha</math></i> | Forward          | 5'-GCTGCACTTTGGAGTGATCG-3'  |
|                                | Reverse          | 5'-CCAGCTGGTTATCTGTCAGC-3'  |
| <i>IL-15</i>                   | Forward          | 5'-CCCAGTTGCAAGGTAACAGC-3'  |
|                                | Reverse          | 5'-TCCTCACATTCTTTGCATCC-3'  |
| <i>IRF1</i>                    | Forward          | 5'-CCATTACACAGGCCGATAC-3'   |
|                                | Reverse          | 5'-GGAATCCCCACATGACTTCC-3'  |
| <i>IL-6</i>                    | Forward          | 5'-AAGGAGACATGTAACAGGAG-3'  |
|                                | Reverse          | 5'-CTAGGTATACCTCAAACCTCC-3' |
| <i>Nectin-1</i>                | Forward          | 5'-CTGCAGTATTAGTGTCTCTCC-3' |
|                                | Reverse          | 5'-GTGCAGGATAAAGGAGATGC-3'  |
| <i>TLR2</i>                    | Forward          | 5'-CGAATACACAGTGTAACAGG-3'  |
|                                | Reverse          | 5'-GAAAAGAGTCAAGTTGCTCC-3'  |
| <i>TLR3</i>                    | Forward          | 5'-GACAAACCTCACTATGCTCG-3'  |
|                                | Reverse          | 5'-CCGTTTCAAATTCAGGTACC-3'  |
| <i>TLR7</i>                    | Forward          | 5'-TGAGTCTCTTAGAACTCTGG-3'  |
|                                | Reverse          | 5'-GGCATACCATCAAAAACCTCC-3' |
